# Supplementary material
Source: PubMed Central journal article supplement (PMC3669633)

## Supplemental Fig. 1

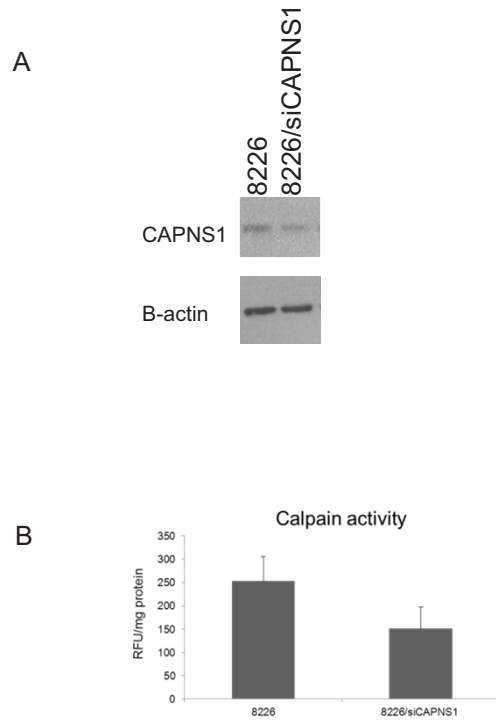

Supplement: NIHMS466216-supplement-280_2013_2156_MOESM1_ESM.pdf [file NIHMS466216-supplement-280_2013_2156_MOESM1_ESM.pdf]

Supplemental Fig. 2

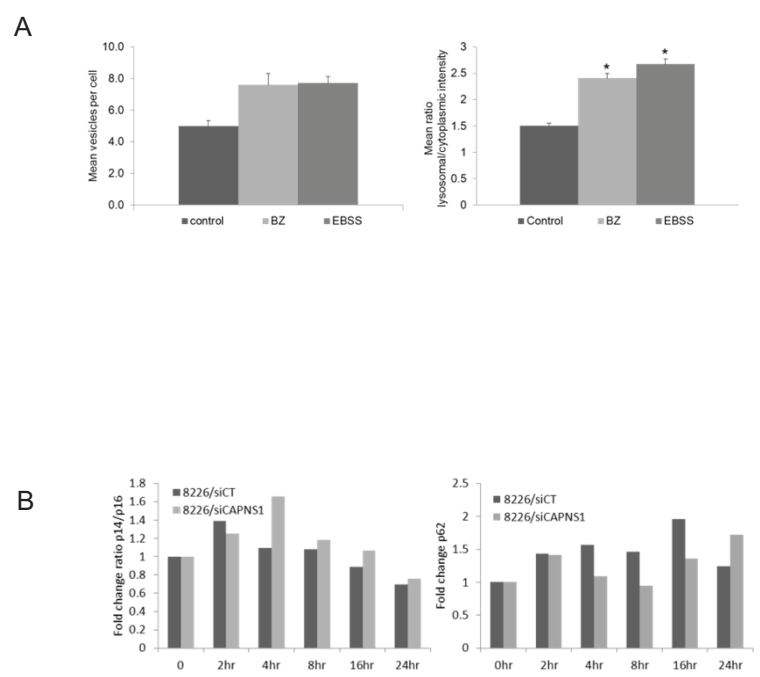

Supplement: NIHMS466216-supplement-280_2013_2156_MOESM2_ESM.pdf [file NIHMS466216-supplement-280_2013_2156_MOESM2_ESM.pdf]
